# Supplementary material for: Blue Whiting (Micromesistius poutassou) Protein Hydrolysates Increase GLP-1 Secretion and Proglucagon Production in STC-1 Cells Whilst Maintaining Caco-2/HT29-MTX Co-Culture Integrity
Source: MDPI journal article supplement (doi:10.3390/md20020112), 2022-01-31
Supplement: s1 [file s1]

**Supplementary Table S2.** The effects of blue whiting protein soluble hydrolysates (BWSPHs) pre- and post- simulated gastrointestinal digestion (SGID) on the viability of a Caco-2/HT-29MTX co-culture.

|             | Cell viability (%) |              |             |              |              |             |              |              |
|-------------|--------------------|--------------|-------------|--------------|--------------|-------------|--------------|--------------|
|             | 0%                 | 0.05%        | 0.1%        | 0.25%        | 0.5%         | 0.75%       | 0.9%         | 1.0%         |
| BW-SPH-A    | 100.0 ± 0.0        | 95.8 ± 8.5   | 104.4 ± 6.5 | 111.5 ± 11.1 | 114.5 ± 12.0 | 113.2 ± 4.0 | 111.6 ± 9.0  | 110.1 ± 6.6  |
| BW-SPH-A-GI | 100.0 ± 0.0        | 102.5 ± 6.1  | 107.1 ± 9.3 | 109.0 ± 7.2  | 107.8 ± 7.6  | 104.6 ± 1.8 | 106.1 ± 3.3  | 102.7 ± 5.7  |
| BW-SPH-B    | 100.0 ± 0.0        | 100.3 ± 3.0  | 102.2 ± 4.6 | 99.2 ± 4.6   | 102.9 ± 6.4  | 100.7 ± 1.5 | 101.0 ± 3.1  | 109.0 ± 14.9 |
| BW-SPH-B-GI | 100.0 ± 0.0        | 111.0 ± 4.5  | 109.7 ± 5.5 | 104.5 ± 2.6  | 110.6 ± 3.7  | 111.0 ± 3.6 | 114.0 ± 6.2  | 107.5 ± 7.9  |
| BW-SPH-C    | 100.0 ± 0.0        | 104.7 ± 2.8  | 107.2 ± 7.1 | 102.5 ± 2.7  | 103.9 ± 10.6 | 97.5 ± 8.8  | 107.3 ± 5.4  | 102.3 ± 8.3  |
| BW-SPH-B-GI | 100.0 ± 0.0        | 93.4 ± 6.5   | 103.3 ± 5.9 | 107.2 ± 4.6  | 102.0 ± 6.7  | 105.4 ± 4.4 | 106.3 ± 3.1  | 96.6 ± 5.9   |
| BW-SPH-D    | 100.0 ± 0.0        | 102.7 ± 8.1  | 99.1 ± 10.5 | 106.4 ± 8.6  | 102.4 ± 12.2 | 99.9 ± 10.0 | 102.2 ± 10.3 | 110.7 ± 2.9  |
| BW-SPH-D-GI | 100.0 ± 0.0        | 93.3 ± 9.1   | 105.8 ± 1.5 | 104.2 ± 6.1  | 106.8 ± 3.1  | 108.2 ± 5.1 | 113.9 ± 5.9  | 98.0 ± 5.5   |
| BW-SPH-E    | 100.0 ± 0.0        | 100.2 ± 7.7  | 103.9 ± 8.9 | 105.5 ± 6.5  | 108.6 ± 9.0  | 100.2 ± 5.1 | 102.4 ± 4.7  | 107.7 ± 7.3  |
| BW-SPH-E-GI | 100.0 ± 0.0        | 109.8 ± 4.4  | 114.9 ± 3.0 | 109.3 ± 4.7  | 118.3 ± 7.5  | 116.9 ± 6.0 | 122.5 ± 3.8  | 108.4 ± 9.8  |
| BW-SPH-F    | 100.0 ± 0.0        | 96.4 ± 8.9   | 97.0 ± 6.2  | 94.4 ± 4.9   | 99.7 ± 12.0  | 102.8 ± 7.9 | 97.8 ± 9.3   | 112.0 ± 8.0  |
| BW-SPH-F-GI | 100.0 ± 0.0        | 112.3 ± 11.4 | 124.0 ± 8.0 | 116.2 ± 7.6  | 123.5 ± 10.4 | 117.9 ± 9.9 | 124.8 ± 4.0  | 114.2 ± 2.5  |

Caco-2/HT-29MTX co-culture ( $6 \times 10^4$  cells/mL, 200  $\mu$ L/well) were supplemented with increasing concentrations (0-1.0%, w/v dw) of BWSPHs (BW-SPH-A to BW-SPH-F) and SGID BWSPHs (BW-SPH-A-GI to BW-SPH-F-GI) in DMEM media for 24 hours. Cell viability was determined by the MTT assay and expressed as a percentage of the untreated control '0%' (DMEM only). Data are the mean  $\pm$  SEM of three independent experiments. Significance was measured using ANOVA followed by Dunnett's test.
