# Supplementary material for: Blue Whiting (Micromesistius poutassou) Protein Hydrolysates Increase GLP-1 Secretion and Proglucagon Production in STC-1 Cells Whilst Maintaining Caco-2/HT29-MTX Co-Culture Integrity
Source: MDPI journal article supplement (doi:10.3390/md20020112), 2022-01-31
Supplement: s1 [file s1]

**Supplementary Table S1.** The effects of blue whiting protein soluble hydrolysates (BWSPHs) pre- and post- simulated gastrointestinal digestion (SGID) on the viability of murine STC-1 cells.

|             | Cell viability (%) |              |              |              |              |              |              |             |
|-------------|--------------------|--------------|--------------|--------------|--------------|--------------|--------------|-------------|
|             | 0%                 | 0.05%        | 0.1%         | 0.25%        | 0.5%         | 0.75%        | 0.9%         | 1.0%        |
| BW-SPH-A    | 100.0 ± 0.0        | 110.0 ± 6.1  | 105.9 ± 3.8  | 99.0 ± 0.5   | 99.0 ± 4.3   | 99.9 ± 5.8   | 97.8 ± 5.0   | 88.1 ± 7.0  |
| BW-SPH-A-GI | 100.0 ± 0.0        | 105.8 ± 10.3 | 114.0 ± 11.5 | 116.4 ± 12.3 | 118.5 ± 14.7 | 111.3 ± 10.5 | 116.4 ± 13.2 | 96.4 ± 4.8  |
| BW-SPH-B    | 100.0 ± 0.0        | 105.5 ± 5.2  | 101.8 ± 4.1  | 102.0 ± 2.4  | 96.8 ± 3.6   | 103.3 ± 5.7  | 101.6 ± 5.6  | 93.3 ± 2.3  |
| BW-SPH-B-GI | 100.0 ± 0.0        | 127.3 ± 4.1  | 118.6 ± 4.4  | 119.3 ± 2.4  | 129.1 ± 5.4  | 127.0 ± 7.6  | 123.3 ± 8.8  | 96.7 ± 5.1  |
| BW-SPH-C    | 100.0 ± 0.0        | 107.6 ± 8.0  | 106.6 ± 5.3  | 106.3 ± 7.1  | 99.9 ± 7.3   | 108.6 ± 8.3  | 103.8 ± 6.4  | 92.2 ± 8.5  |
| BW-SPH-B-GI | 100.0 ± 0.0        | 123.3 ± 0.5  | 117.1 ± 3.5  | 128.3 ± 2.9  | 128.2 ± 5.3  | 129.5 ± 7.8  | 122.7 ± 9.8  | 93.0 ± 3.1  |
| BW-SPH-D    | 100.0 ± 0.0        | 93.8 ± 3.2   | 84.8 ± 4.7   | 86.8 ± 6.1   | 84.5 ± 7.9   | 83.0 ± 7.9   | 82.4 ± 7.2   | 82.4 ± 9.0  |
| BW-SPH-D-GI | 100.0 ± 0.0        | 122.4 ± 7.5  | 114.3 ± 5.9  | 121.1 ± 4.4  | 124.6 ± 7.5  | 116.0 ± 7.0  | 122.6 ± 7.8  | 94.3 ± 0.8  |
| BW-SPH-E    | 100.0 ± 0.0        | 106 ± 5.4    | 104.4 ± 4.2  | 100.8 ± 4.1  | 97.8 ± 5.0   | 99.2 ± 2.9   | 99.5 ± 4.6   | 86.8 ± 0.7  |
| BW-SPH-E-GI | 100.0 ± 0.0        | 122.5 ± 5.2  | 117.7 ± 5.5  | 124.8 ± 5.6  | 124.2 ± 9.4  | 122.0 ± 8.2  | 113.8 ± 5.3  | 94.4 ± 3.7  |
| BW-SPH-F    | 100.0 ± 0.0        | 103.7 ± 2.0  | 100.2 ± 2.4  | 105.8 ± 2.2  | 95.7 ± 2.9   | 98.7 ± 6.3   | 95.6 ± 1.4   | 84.4 ± 0.3  |
| BW-SPH-F-GI | 100.0 ± 0.0        | 105.7 ± 8.7  | 106.4 ± 10.5 | 104.1 ± 8.4  | 106.8 ± 10.9 | 103.1 ± 6.4  | 116.0 ± 6.6  | 103.8 ± 5.0 |

Murine STC-1 cells ( $2 \times 10^5$  cells/mL, 200  $\mu$ L/well) were supplemented with increasing concentrations (0-1.0%, w/v dw) of BWSPHs (BW-SPH-A to BW-SPH-F) and SGID BWSPHs (BW-SPH-A-GI to BW-SPH-F-GI) for 24 hours. Cell viability was determined by the MTT assay and expressed as a percentage of the untreated control. Data are the mean  $\pm$  SEM of three independent experiments. Significance was measured using ANOVA followed by Dunnett's test.
